# Supplementary material for: Coffee, smoking and aspirin are associated with age at onset in idiopathic Parkinson’s disease
Source: PubMed Central journal article supplement (PMC9294004; doi:10.1007/s00415-022-11041-x), 2022-03-02
Supplement: 415_2022_11041_MOESM1_ESM.pdf [file 415_2022_11041_MOESM1_ESM.pdf]

## **Supplementary Information:**

### **Coffee, smoking and aspirin are associated with age at onset in idiopathic Parkinson's disease**

Carolin Gabbert<sup>1</sup>, MSc, Prof. Inke R. König<sup>2</sup>, Theresa Lüth<sup>1</sup>, MSc, Beke Kolms<sup>1</sup>, BSc, Meike Kasten<sup>1,3</sup>, MD, Eva-Juliane Vollstedt<sup>1</sup>, MD, Alexander Balck<sup>1</sup>, MD, Fox Insight Study, Anne Grünewald<sup>1,4</sup>, PhD, Christine Klein<sup>1</sup>, MD, Joanne Trinh<sup>1\*</sup>, PhD

<sup>1</sup>Institute of Neurogenetics, University of Lübeck, Lübeck, Germany

<sup>2</sup>Institute of Medical Biometry and Statistics, University of Lübeck, Lübeck, Germany

<sup>3</sup>Department of Psychiatry and Psychotherapy, University of Lübeck, Lübeck, Germany

<sup>4</sup>Luxembourg Centre for Systems Biomedicine, University of Luxembourg, Esch-sur-Alzette, Luxembourg

#### **\* Correspondence:**

Joanne Trinh

University of Lübeck

Ratzeburger Allee 160

23538 Lübeck, Germany

Email: [joanne.trinh@neuro.uni-luebeck.de](mailto:joanne.trinh@neuro.uni-luebeck.de)

Tel.: +49-451-31018202

**Table S1** Demographics of the Fox Insight participants

| <b>Full Cohort (n=35,963)</b>                          | <b>Patients with PD</b> |
|--------------------------------------------------------|-------------------------|
| <b>Male (%)</b>                                        | 18,349 (51.0%)          |
| <b>Female (%)</b>                                      | 14,528 (40.4%)          |
| <b>Ethnicity:</b>                                      |                         |
| <b>White/Caucasian (%)</b>                             | 32,332 (89.9%)          |
| <b>Black/African American (%)</b>                      | 369 (1.0%)              |
| <b>American Indian/Alaska Native (%)</b>               | 393 (1.1%)              |
| <b>Asian (%)</b>                                       | 691 (1.9%)              |
| <b>Native Hawaiian/Other Pacific Islander (%)</b>      | 47 (0.1%)               |
| <b>Hispanic/Latino/Spanish Origin (%)</b>              | 1,692 (4.7%)            |
| <b>Mean AAO (SD)</b>                                   | 60.4 (11.0)             |
| <b>Median AAO (IQR)</b>                                | 61.3 (53.6-68.1)        |
| <b>Mean AAE (SD)</b>                                   | 65.7 (10.2)             |
| <b>Median AAE (IQR)</b>                                | 66.7 (59.6-72.6)        |
| <b>Mean Current Age (SD)</b>                           | 66.9 (10.2)             |
| <b>Median Current Age (IQR)</b>                        | 68.0 (60.8-73.7)        |
| <b>Mean Disease Duration until Examination (SD)</b>    | 5.3 (5.6)               |
| <b>Median Disease Duration until Examination (IQR)</b> | 3.5 (1.2-7.6)           |
| <b>Mean Disease Duration until Current Age (SD)</b>    | 6.5 (5.7)               |
| <b>Median Disease Duration until Current Age (IQR)</b> | 5.0 (2.5-8.9)           |

## Supplementary text:

### ***Fox Insight study:***

The Fox Insight study is an ongoing online, longitudinal health study of people with and without PD with targeted enrollment set to at least 125,000 individuals [1]. The data is a rich data set facilitating discovery, validation, and reproducibility in PD research. The dataset is generated through routine longitudinal assessments (health and medical questionnaires evaluated at regular cycles); one-time health and disease questionnaires about symptoms, daily activities, and other factors; and, in a subgroup of people with PD, genetic data collection. Qualified researchers can explore, analyze, and download patient-reported outcomes (PROs) data and PD-related genetic variants at <https://foxden.michaeljfox.org>. The full Fox Insight genetic data set, including approximately 650,000 single nucleotide polymorphisms (SNPs) per participant, can be requested separately with institutional review.

Fox Insight participants were 18 years of age or older and provided informed consent. In the process of registration, participants were divided into two groups, PD patients and controls, the latter were asked about new diagnoses every three months. PD patients responded to health, non-motor assessments, motor assessments, quality of life, and lifestyle questionnaires.

The PD-RFQ-U on “Smoking and Tobacco” questionnaire was used to evaluate smoking, the PD-RFQ-U on “Caffeine” to evaluate coffee drinking and black tea drinking, and the PD-RFQ-U on “Anti-inflammatory Medication History” for anti-inflammatory drug intake. The survey on “Your Health History” was used to include possible comorbidities in our models. All of these data were self-reported by the patients.

For each environmental or lifestyle factor the corresponding datasets were downloaded from the FoxDEN website (<https://foxden.michaeljfox.org/insight/explore/fox.jsp>) (log:18/10/2020).

### ***Statistical analysis:***

For a first statistical analysis, non-parametric Mann-Whitney U test was performed to compare the distribution of AAO between different groups. For correlation analyses, non-parametric Spearman correlations and linear regression analyses were used to assess correlations and interactions between variables (GraphPad Software Inc., San Diego, CA, USA). For a more in-depth analysis, we performed multilinear regression models to investigate the relationship between environmental factors, age, disease duration, motor/non-motor symptoms and potential comorbidities (IBM SPSS Statistics).

#### *Regression model investigating AAO, AAE, environmental factors (binary/dosage/duration):*

- `glm(formula = AAO ~ AAE + EnvFactorBinary, family = gaussian, data = data)`
- `glm(formula = AAO ~ AAE + EnvFactorDosage, family = gaussian, data = data)`
- `glm(formula = AAO ~ AAE + EnvFactorDuration, family = gaussian, data = data)`

#### *Regression model investigating AAO, AAE, gender, environmental factors (binary/dosage/duration) and comorbidities:*

- `glm(formula = AAO ~ AAE + Gender + EnvFactorBinary (+Comorbidity), family = gaussian, data = data)`
- `glm(formula = AAO ~ AAE + Gender + EnvFactorDosage (+Comorbidity), family = gaussian, data = data)`
- `glm(formula = AAO ~ AAE + Gender + EnvFactorDuration (+Comorbidity), family = gaussian, data = data)`

#### *Regression model investigating AAO and combined environmental factors:*

- `glm(formula = AAO ~ SmokingBinary + CoffeeBinary + AspirinBinary, family = gaussian, data = data)`

#### *Regression model investigating AAO, AAE, gender, combined environmental factors and comorbidities:*

- `glm(formula = AAO ~ AAE + Gender + SmokingBinary + CoffeeBinary + AspirinBinary + BackPain, family = gaussian, data = data)`

***Exclusion and inclusion criteria:***

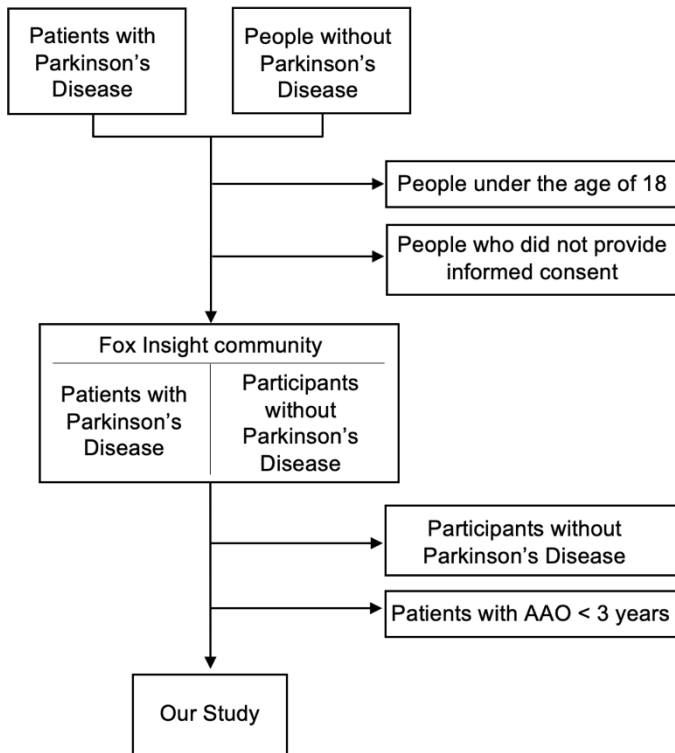

**Fig. S1** Work flow of the inclusion and exclusion criteria of participant recruitment from the Fox Insight Study and for this study.

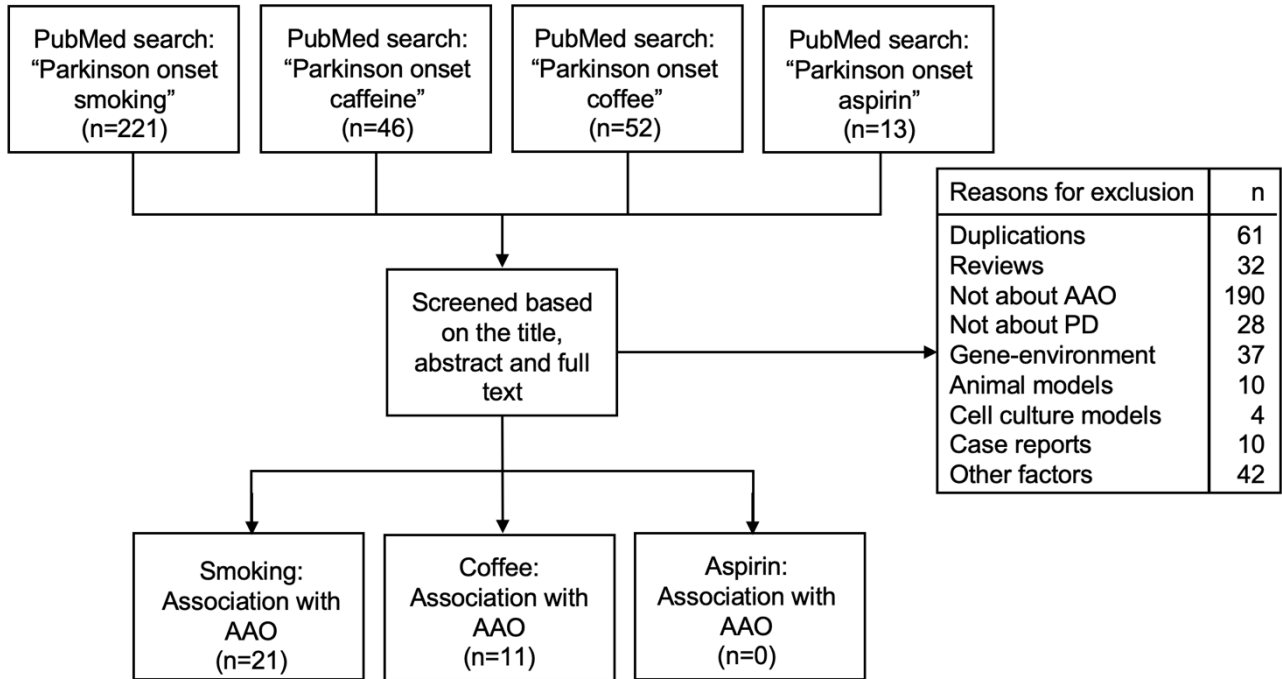

**Fig. S2** Work flow of the literature search in PubMed. We searched for literature via PubMed that was published before December 14, 2021. We used the free text search terms “Parkinson onset smoking”, resulting in 221 articles, “Parkinson onset caffeine”, resulting in 46 articles, “Parkinson onset coffee”, resulting in 52 articles and “Parkinson onset aspirin”, resulting in 13 articles. These were screened based on the title, abstract and full text, excluding all articles not directly investigating smoking, coffee drinking or aspirin intake and their influence on AAO in PD. Reasons for exclusion and the number of excluded articles are shown (multiple reasons for exclusion were possible). In the end, 21 articles were obtained that described a relationship between AAO and smoking, and 11 articles describing a relationship between AAO and coffee, with an overlap of 7 articles. There was no study that investigated the association between AAO and aspirin. Reasons for exclusion: Duplications: duplicates between the different search terms; Reviews: review articles without new investigations; Not about AAO: articles not examining AAO or articles not investigating the association between AAO and smoking, caffeine/coffee or aspirin; Not about PD: articles about other diseases or about symptoms or parts of PD; Gene-environment: studies investigating gene-environment interactions and the influence of environmental factors on specific genotypes; Animal models: articles studying animals, not humans; Cell culture models: studies only on cells; Case reports: descriptions of single cases; Other factors: studies investigating other environmental factors than smoking, coffee/caffeine or aspirin in PD or only adjusting for smoking, coffee/caffeine or aspirin in regression models to predict other factors

**Table S2** Generalized linear models. Regression models for AAO and environmental factors smoking, coffee drinking and aspirin intake in the Fox Insight cohort

**Dependent variable: AAO**

| Covariates       | Regression coefficient $\beta$ | Standard error | p-value             |
|------------------|--------------------------------|----------------|---------------------|
| AAE              | 0.9343                         | 0.0075         | $<1 \times 10^{-5}$ |
| Smoking (binary) | 0.5354                         | 0.1424         | 0.0002              |

  

| Covariates     | Regression coefficient $\beta$ | Standard error | p-value             |
|----------------|--------------------------------|----------------|---------------------|
| AAE            | 0.9277                         | 0.0083         | $<1 \times 10^{-5}$ |
| Smoking Dosage | 0.0172                         | 0.0055         | 0.0016              |

  

| Covariates       | Regression coefficient $\beta$ | Standard error | p-value             |
|------------------|--------------------------------|----------------|---------------------|
| AAE              | 0.9543                         | 0.0168         | $<1 \times 10^{-5}$ |
| Smoking Duration | 0.0074                         | 0.0127         | 0.5583              |

  

| Covariates               | Regression coefficient $\beta$ | Standard error | p-value             |
|--------------------------|--------------------------------|----------------|---------------------|
| AAE                      | 0.9298                         | 0.0077         | $<1 \times 10^{-5}$ |
| Coffee drinking (binary) | 0.9176                         | 0.1704         | $<1 \times 10^{-5}$ |

  

| Covariates             | Regression coefficient $\beta$ | Standard error | p-value             |
|------------------------|--------------------------------|----------------|---------------------|
| AAE                    | 0.9348                         | 0.0086         | $<1 \times 10^{-5}$ |
| Coffee drinking Dosage | 0.0309                         | 0.0078         | $8 \times 10^{-5}$  |

  

| Covariates               | Regression coefficient $\beta$ | Standard error | p-value             |
|--------------------------|--------------------------------|----------------|---------------------|
| AAE                      | 0.8239                         | 0.0122         | $<1 \times 10^{-5}$ |
| Coffee drinking Duration | 0.1268                         | 0.0083         | $<1 \times 10^{-5}$ |

  

| Covariates              | Regression coefficient $\beta$ | Standard error | p-value             |
|-------------------------|--------------------------------|----------------|---------------------|
| AAE                     | 0.9272                         | 0.0103         | $<1 \times 10^{-5}$ |
| Aspirin intake (binary) | 0.7654                         | 0.1958         | $9 \times 10^{-5}$  |

  

| Covariates            | Regression coefficient $\beta$ | Standard error | p-value             |
|-----------------------|--------------------------------|----------------|---------------------|
| AAE                   | 0.9318                         | 0.0103         | $<1 \times 10^{-5}$ |
| Aspirin intake Dosage | 0.0315                         | 0.0190         | 0.0972              |

  

| Covariates              | Regression coefficient $\beta$ | Standard error | p-value             |
|-------------------------|--------------------------------|----------------|---------------------|
| AAE                     | 0.9195                         | 0.0198         | $<1 \times 10^{-5}$ |
| Aspirin intake Duration | 0.0319                         | 0.0133         | 0.0165              |

| <b>Covariates</b> | <b>Regression coefficient <math>\beta</math></b> | <b>Standard error</b> | <b>p-value</b>      |
|-------------------|--------------------------------------------------|-----------------------|---------------------|
| AAE               | 0.9334                                           | 0.0078                | $<1 \times 10^{-5}$ |
| Gender            | 0.0234                                           | 0.1419                | 0.8688              |
| Lung Disease      | 0.0608                                           | 0.2028                | 0.7642              |
| Smoking (binary)  | 0.5051                                           | 0.1456                | 0.0005              |

| <b>Covariates</b> | <b>Regression coefficient <math>\beta</math></b> | <b>Standard error</b> | <b>p-value</b>      |
|-------------------|--------------------------------------------------|-----------------------|---------------------|
| AAE               | 0.9254                                           | 0.0086                | $<1 \times 10^{-5}$ |
| Gender            | 0.0292                                           | 0.1564                | 0.8518              |
| Lung Disease      | 0.0332                                           | 0.2239                | 0.8822              |
| Smoking Dosage    | 0.0165                                           | 0.0055                | 0.0030              |

| <b>Covariates</b> | <b>Regression coefficient <math>\beta</math></b> | <b>Standard error</b> | <b>p-value</b>      |
|-------------------|--------------------------------------------------|-----------------------|---------------------|
| AAE               | 0.9627                                           | 0.0179                | $<1 \times 10^{-5}$ |
| Gender            | 0.2611                                           | 0.3259                | 0.4230              |
| Lung Disease      | 0.0053                                           | 0.4432                | 0.9905              |
| Smoking Duration  | 0.0074                                           | 0.0131                | 0.5741              |

| <b>Covariates</b>        | <b>Regression coefficient <math>\beta</math></b> | <b>Standard error</b> | <b>p-value</b>      |
|--------------------------|--------------------------------------------------|-----------------------|---------------------|
| AAE                      | 0.9279                                           | 0.0080                | $<1 \times 10^{-5}$ |
| Gender                   | -0.0178                                          | 0.1450                | 0.9026              |
| Coffee drinking (binary) | 0.9379                                           | 0.1750                | $<1 \times 10^{-5}$ |

| <b>Covariates</b>      | <b>Regression coefficient <math>\beta</math></b> | <b>Standard error</b> | <b>p-value</b>      |
|------------------------|--------------------------------------------------|-----------------------|---------------------|
| AAE                    | 0.9340                                           | 0.0089                | $<1 \times 10^{-5}$ |
| Gender                 | 0.1385                                           | 0.1635                | 0.3969              |
| Coffee drinking Dosage | 0.0321                                           | 0.0081                | 0.0001              |

| <b>Covariates</b>        | <b>Regression coefficient <math>\beta</math></b> | <b>Standard error</b> | <b>p-value</b>      |
|--------------------------|--------------------------------------------------|-----------------------|---------------------|
| AAE                      | 0.8237                                           | 0.0125                | $<1 \times 10^{-5}$ |
| Gender                   | 0.2130                                           | 0.1900                | 0.2623              |
| Coffee drinking Duration | 0.1276                                           | 0.0084                | $<1 \times 10^{-5}$ |

| <b>Covariates</b>       | <b>Regression coefficient <math>\beta</math></b> | <b>Standard error</b> | <b>p-value</b>      |
|-------------------------|--------------------------------------------------|-----------------------|---------------------|
| AAE                     | 0.9250                                           | 0.0108                | $<1 \times 10^{-5}$ |
| Gender                  | 0.0306                                           | 0.1860                | 0.8695              |
| Aspirin intake (binary) | 0.6979                                           | 0.2063                | 0.0007              |
| Heart Disease           | 0.0228                                           | 0.2747                | 0.9340              |

| <b>Covariates</b>       | <b>Regression coefficient <math>\beta</math></b> | <b>Standard error</b> | <b>p-value</b>      |
|-------------------------|--------------------------------------------------|-----------------------|---------------------|
| AAE                     | 0.9259                                           | 0.0109                | $<1 \times 10^{-5}$ |
| Gender                  | 0.0100                                           | 0.1879                | 0.9575              |
| Aspirin intake (binary) | 0.6791                                           | 0.2016                | 0.0008              |
| Arthritis               | 0.0650                                           | 0.1911                | 0.7337              |

| <b>Covariates</b>       | <b>Regression coefficient <math>\beta</math></b> | <b>Standard error</b> | <b>p-value</b>      |
|-------------------------|--------------------------------------------------|-----------------------|---------------------|
| AAE                     | 0.9282                                           | 0.0107                | $<1 \times 10^{-5}$ |
| Gender                  | 0.0252                                           | 0.1849                | 0.8917              |
| Aspirin intake (binary) | 0.7082                                           | 0.2012                | 0.0004              |
| Back Pain               | -0.4855                                          | 0.1830                | 0.0080              |

| <b>Covariates</b>         | <b>Regression coefficient <math>\beta</math></b> | <b>Standard error</b> | <b>p-value</b>      |
|---------------------------|--------------------------------------------------|-----------------------|---------------------|
| AAE                       | 0.9264                                           | 0.0107                | $<1 \times 10^{-5}$ |
| Gender                    | 0.0108                                           | 0.1861                | 0.9538              |
| Aspirin intake (binary)   | 0.6732                                           | 0.2018                | 0.0008              |
| Surgeries with Anesthesia | 0.1781                                           | 0.3219                | 0.5801              |

| <b>Covariates</b>     | <b>Regression coefficient <math>\beta</math></b> | <b>Standard error</b> | <b>p-value</b>      |
|-----------------------|--------------------------------------------------|-----------------------|---------------------|
| AAE                   | 0.9274                                           | 0.0109                | $<1 \times 10^{-5}$ |
| Gender                | 0.0504                                           | 0.1888                | 0.7893              |
| Aspirin intake Dosage | 0.0263                                           | 0.0197                | 0.1811              |
| Heart Disease         | 0.2443                                           | 0.2827                | 0.3875              |

| <b>Covariates</b>     | <b>Regression coefficient <math>\beta</math></b> | <b>Standard error</b> | <b>p-value</b>      |
|-----------------------|--------------------------------------------------|-----------------------|---------------------|
| AAE                   | 0.9292                                           | 0.0109                | $<1 \times 10^{-5}$ |
| Gender                | 0.0082                                           | 0.1906                | 0.9657              |
| Aspirin intake Dosage | 0.0267                                           | 0.0194                | 0.1693              |
| Arthritis             | 0.1215                                           | 0.1950                | 0.5331              |

| <b>Covariates</b>     | <b>Regression coefficient <math>\beta</math></b> | <b>Standard error</b> | <b>p-value</b>      |
|-----------------------|--------------------------------------------------|-----------------------|---------------------|
| AAE                   | 0.9319                                           | 0.0107                | $<1 \times 10^{-5}$ |
| Gender                | 0.0309                                           | 0.1875                | 0.8693              |
| Aspirin intake Dosage | 0.0303                                           | 0.0194                | 0.1188              |
| Back Pain             | -0.4144                                          | 0.1867                | 0.0264              |



| <b>Covariates</b>         | <b>Regression coefficient <math>\beta</math></b> | <b>Standard error</b> | <b>p-value</b>      |
|---------------------------|--------------------------------------------------|-----------------------|---------------------|
| AAE                       | 0.9300                                           | 0.0108                | $<1 \times 10^{-5}$ |
| Gender                    | 0.0149                                           | 0.1887                | 0.9372              |
| Aspirin intake Dosage     | 0.0267                                           | 0.0194                | 0.1703              |
| Surgeries with Anesthesia | 0.2440                                           | 0.3229                | 0.4499              |

| <b>Covariates</b>       | <b>Regression coefficient <math>\beta</math></b> | <b>Standard error</b> | <b>p-value</b>      |
|-------------------------|--------------------------------------------------|-----------------------|---------------------|
| AAE                     | 0.9193                                           | 0.0213                | $<1 \times 10^{-5}$ |
| Gender                  | 0.2667                                           | 0.3301                | 0.4191              |
| Aspirin intake Duration | 0.0353                                           | 0.0140                | 0.0114              |
| Heart Disease           | 0.2950                                           | 0.3396                | 0.3850              |

| <b>Covariates</b>       | <b>Regression coefficient <math>\beta</math></b> | <b>Standard error</b> | <b>p-value</b>      |
|-------------------------|--------------------------------------------------|-----------------------|---------------------|
| AAE                     | 0.9204                                           | 0.0212                | $<1 \times 10^{-5}$ |
| Gender                  | 0.1529                                           | 0.3344                | 0.6474              |
| Aspirin intake Duration | 0.0338                                           | 0.0140                | 0.0153              |
| Arthritis               | 0.3836                                           | 0.3166                | 0.2257              |

| <b>Covariates</b>       | <b>Regression coefficient <math>\beta</math></b> | <b>Standard error</b> | <b>p-value</b>      |
|-------------------------|--------------------------------------------------|-----------------------|---------------------|
| AAE                     | 0.9221                                           | 0.0210                | $<1 \times 10^{-5}$ |
| Gender                  | 0.2600                                           | 0.3293                | 0.4297              |
| Aspirin intake Duration | 0.0359                                           | 0.0140                | 0.0103              |
| Back Pain               | -0.3227                                          | 0.3078                | 0.2945              |

| <b>Covariates</b>         | <b>Regression coefficient <math>\beta</math></b> | <b>Standard error</b> | <b>p-value</b>      |
|---------------------------|--------------------------------------------------|-----------------------|---------------------|
| AAE                       | 0.9231                                           | 0.0210                | $<1 \times 10^{-5}$ |
| Gender                    | 0.2654                                           | 0.3294                | 0.4204              |
| Aspirin intake Duration   | 0.0362                                           | 0.0140                | 0.0097              |
| Surgeries with Anesthesia | -0.7760                                          | 0.7107                | 0.2748              |

| <b>Covariates</b>        | <b>Regression coefficient <math>\beta</math></b> | <b>Standard error</b> | <b>p-value</b>      |
|--------------------------|--------------------------------------------------|-----------------------|---------------------|
| Smoking (binary)         | 1.8261                                           | 0.3767                | $<1 \times 10^{-5}$ |
| Coffee drinking (binary) | 2.5233                                           | 0.4158                | $<1 \times 10^{-5}$ |
| Aspirin intake (binary)  | 4.8768                                           | 0.3698                | $<1 \times 10^{-5}$ |

| <b>Covariates</b>        | <b>Regression coefficient <math>\beta</math></b> | <b>Standard error</b> | <b>p-value</b>      |
|--------------------------|--------------------------------------------------|-----------------------|---------------------|
| AAE                      | 0.9224                                           | 0.0109                | $<1 \times 10^{-5}$ |
| Gender                   | 0.1592                                           | 0.1881                | 0.3975              |
| Smoking (binary)         | 0.6400                                           | 0.2006                | 0.0014              |
| Coffee drinking (binary) | 1.1057                                           | 0.2222                | $<1 \times 10^{-5}$ |
| Aspirin intake (binary)  | 0.7463                                           | 0.2041                | 0.0003              |
| Back Pain                | -0.5435                                          | 0.1855                | 0.0034              |

**Table S3** Publications on AAO and smoking/coffee of the literature search in PubMed

| Authors, Year (PMID)                  | n (PD/control) | n (smokers with PD/ non-smokers with PD) | n (coffee drinkers with PD/ coffee non-drinkers with PD) | Effect on AAO                                                                                                                                                                                                                                                                                                                                                                                                                                                                                                                                                                                                                                                                                                           |
|---------------------------------------|----------------|------------------------------------------|----------------------------------------------------------|-------------------------------------------------------------------------------------------------------------------------------------------------------------------------------------------------------------------------------------------------------------------------------------------------------------------------------------------------------------------------------------------------------------------------------------------------------------------------------------------------------------------------------------------------------------------------------------------------------------------------------------------------------------------------------------------------------------------------|
| Benedetti et al., 2000 (11087780) [2] | 196/196        | NA                                       | NA                                                       | <b>Smoking:</b> <ul style="list-style-type: none"><li>- Ever-smokers: median AAO 70 years</li><li>- Never-smokers: median AAO 71.5 years</li><li>→ Similar AAO</li></ul> <b>Coffee:</b> <ul style="list-style-type: none"><li>- Coffee-drinkers: median AAO 72 years</li><li>- Non-drinkers median AAO 64 years</li><li>→ Later AAO</li></ul>                                                                                                                                                                                                                                                                                                                                                                           |
| Kandinov et al., 2009 (18434232) [3]  | 278/0          | 111/167                                  | 180/98                                                   | <b>Smoking:</b> <ul style="list-style-type: none"><li>- Smokers: 1-9 pack-years: mean AAO 57.1 years, <math>\geq 10</math> pack-years: mean AAO 61.2 years</li><li>- Non-smokers: mean AAO 57.2 years (<math>p=0.7</math>; <math>p=0.04</math>)</li><li>- A higher amount of cigarettes smoked per day, showed a later AAO</li><li>→ Later AAO (when <math>\geq 10</math> pack-years)</li></ul> <b>Coffee:</b> <ul style="list-style-type: none"><li>- Coffee-drinkers: <math>&lt;2</math> daily cups: mean AAO 58 years, 2-3 daily cups: mean AAO 57.6 years, <math>&gt;3</math> daily cups: mean AAO 55 years</li><li>- Coffee non-drinkers: mean AAO 59.5 years</li><li>→ Earlier AAO (with dosage effect)</li></ul> |

|                                      |                                                                             |                                                                                                           |                                                                                                                          |                                                                                                                                                                                                                                                                                                                                                                                                                                                                                                                                                                                                                                                                                                                                                                              |
|--------------------------------------|-----------------------------------------------------------------------------|-----------------------------------------------------------------------------------------------------------|--------------------------------------------------------------------------------------------------------------------------|------------------------------------------------------------------------------------------------------------------------------------------------------------------------------------------------------------------------------------------------------------------------------------------------------------------------------------------------------------------------------------------------------------------------------------------------------------------------------------------------------------------------------------------------------------------------------------------------------------------------------------------------------------------------------------------------------------------------------------------------------------------------------|
| Lüth et al., 2020<br>(32875616) [4]  | 342/57<br><br>(142 with LRRK2<br>G2019S PD) and<br>57 mutation<br>carriers) | 112 /199<br><br>(41 smokers with<br>LRRK2 G2019S<br>PD and 85 non-<br>smokers with<br>LRRK2 G2019S<br>PD) | 182 /130<br><br>(62 coffee drinkers<br>with LRRK2<br>G2019S PD and 63<br>coffee non-drinkers<br>with LRRK2<br>G2019S PD) | <p><b>Smoking:</b></p> <ul style="list-style-type: none"> <li>- LRRK2 PD:<br/>Smokers: median AAO 60 years<br/>Non-smokers: median AAO 52 years (p=0.0215)</li> <li>- iPD:<br/>Smokers: median AAO 55 years,<br/>Non-smokers: median 53.5 years (p=0.7906)</li> <li>- Number of cigarettes per day correlated with AAO (p=0.0296) as well as smoking duration (p&lt;0.0001)</li> </ul> <p>→ Later AAO (in LRRK2 PD)</p> <p><b>Coffee:</b></p> <ul style="list-style-type: none"> <li>- LRRK2 PD:<br/>Coffee-drinkers: median AAO 55 years<br/>Non-drinkers: median AAO 52 years (p=0.5439)</li> <li>- iPD:<br/>Coffee-drinkers: median AAO 55 years<br/>Non-drinkers: median AAO 52 years (p=0.3279)</li> </ul> <p>→ Trend to a later AAO, but no significant difference</p> |
| Maher et al., 2002<br>(11781409) [5] | 396/0                                                                       | 81/337                                                                                                    | 401/17                                                                                                                   | <p><b>Smoking:</b></p> <ul style="list-style-type: none"> <li>- Among siblings who smoked, pack-years of smoking was related to later age at onset (p=0.0001)</li> </ul> <p>→ Later AAO</p> <p><b>Coffee:</b></p> <ul style="list-style-type: none"> <li>- The mean age at onset did not differ according to exposure to coffee (p=0.79)</li> </ul> <p>→ Similar AAO</p>                                                                                                                                                                                                                                                                                                                                                                                                     |

|                                           |                                                                      |                                                                                                                                |                                                                                                                              |                                                                                                                                                                                                                                                                                                                                                                                                                                                    |
|-------------------------------------------|----------------------------------------------------------------------|--------------------------------------------------------------------------------------------------------------------------------|------------------------------------------------------------------------------------------------------------------------------|----------------------------------------------------------------------------------------------------------------------------------------------------------------------------------------------------------------------------------------------------------------------------------------------------------------------------------------------------------------------------------------------------------------------------------------------------|
| Wijeyekoon et al., 2017<br>(29057010) [6] | 144/102                                                              | NA                                                                                                                             | NA                                                                                                                           | <p><b>Smoking:</b></p> <ul style="list-style-type: none"> <li>- Ever-smoking in males associated with delayed AAO (p=0.048)</li> <li>→ Later AAO (in males)</li> </ul> <p><b>Coffee:</b></p> <ul style="list-style-type: none"> <li>- Regular coffee drinking associated with later AAO (p&lt;0.001)</li> <li>→ Later AAO</li> </ul>                                                                                                               |
| Wilk et al., 2007<br>(17408493) [7]       | NA                                                                   | NA                                                                                                                             | NA                                                                                                                           | <p><b>Smoking:</b></p> <ul style="list-style-type: none"> <li>- Current cigarette smoking is a predictor of PD age-at-onset and age at-enrollment in both the full and age-restricted samples.</li> <li>→ Later AAO</li> </ul> <p><b>Coffee:</b></p> <ul style="list-style-type: none"> <li>- Coffee drinking is a predictor of PD age-at-onset and age at-enrollment in both the full and age-restricted samples.</li> <li>→ Later AAO</li> </ul> |
| Yahalom et al., 2020<br>(32310186) [8]    | 225/0<br>(65 with LRRK2<br>G2019S PD and 60<br>with GBA N370S<br>PD) | 98 /127<br>(26 with LRRK2<br>G2019S PD and 39<br>mutation carriers<br>and 27 with GBA<br>N370S PD and 33<br>mutation carriers) | 199 /25<br>(56 with LRRK2<br>G2019S PD and 9<br>mutation carriers<br>and 53 with GBA<br>N370S PD and 6<br>mutation carriers) | <p><b>Smoking:</b></p> <ul style="list-style-type: none"> <li>- Smoking associated with AAO (p = 0.032)</li> <li>→ Later AAO</li> </ul> <p><b>Coffee:</b></p> <ul style="list-style-type: none"> <li>- Consumption level of coffee (p=0.001) significantly associated with PD AAO</li> <li>→ Later AAO the higher the amount of coffee</li> </ul>                                                                                                  |
| De Reuck et al., 2005<br>(15792818) [9]   | 512/0                                                                | 184/328                                                                                                                        | NA                                                                                                                           | <p><b>Smoking:</b></p> <ul style="list-style-type: none"> <li>- Ever-smokers: mean AAO 65.9 years</li> <li>- Never-smokers: mean AAO 62.4 years (p=0.001)</li> <li>→ Later AAO</li> </ul>                                                                                                                                                                                                                                                          |

|                                                   |             |         |                           |                                                                                                                                                                                                                                                                                                    |
|---------------------------------------------------|-------------|---------|---------------------------|----------------------------------------------------------------------------------------------------------------------------------------------------------------------------------------------------------------------------------------------------------------------------------------------------|
| Gallo et al., 2019<br>(30462234) [10]             | 715/213,818 | 312/404 | NA                        | <b>Smoking:</b> <ul style="list-style-type: none"> <li>- The risk does not vary over the follow-up period, and this argues against a delaying effect of smoking on PD onset</li> </ul>                                                                                                             |
| Gigante et al., 2017<br>(28988683) [11]           | 262/0       | 111/151 | NA                        | <b>Smoking:</b> <ul style="list-style-type: none"> <li>- Ever-smokers: mean AAO 61.7 years</li> <li>- Never-smokers: mean AAO 59.3 years (p=0.03)</li> <li>→ Later AAO</li> </ul>                                                                                                                  |
| Grandinetti et al., 1994<br>(8209872) [12]        | 58/0        | 25/33   | NA                        | <b>Smoking:</b> <ul style="list-style-type: none"> <li>- Ever-smokers: mean AAO 69.2 years</li> <li>- Never-smokers: mean AAO 70.2 years (p=0.49)</li> <li>→ Similar AAO</li> </ul>                                                                                                                |
| Greenbaum et al., 2013<br>(22884254) [13]         | 677/0       | 239/438 | NA                        | <b>Smoking:</b> <ul style="list-style-type: none"> <li>- Ever-smokers: mean AAO 54.4 years</li> <li>- Never-smokers: mean AAO 55.8 years (p=NS)</li> <li>→ Similar AAO</li> </ul>                                                                                                                  |
| Haack et al., 1981<br>(7304554) [14]              | 237/474     | 87/150  | 223/14<br>(coffee or tea) | <b>Smoking:</b> <ul style="list-style-type: none"> <li>- Smokers: mean AAO 52.7 years (men: 54.4 years, women: 42.5)</li> <li>- Non-smokers: mean AAO 57.8 years (men: 58.9 years, women: 55.4)</li> <li>→ Earlier AAO</li> </ul>                                                                  |
| Jiménez-Jiménez et al.,<br>1992<br>(1484528) [15] | 128/256     | NA      | NA                        | <b>Smoking:</b> <ul style="list-style-type: none"> <li>- No significant correlation between premorbid levels of exposure to cigarette smoking and AAO in the PD group.</li> </ul>                                                                                                                  |
| Kuopio et al., 1999<br>(10584666) [16]            | 123/246     | NA      | NA                        | <b>Smoking:</b> <ul style="list-style-type: none"> <li>- Ever-smokers: AAO 65.0 years</li> <li>- Never-smokers: AAO 61.8 years (p=0.051)</li> <li>→ Later AAO</li> <li>- Male ever-smokers: AAO 64.8 years</li> <li>- Male never-smokers: AAO 58.3 years (p=0.009)</li> <li>→ Later AAO</li> </ul> |

|                                               |         |                                                      |    |                                                                                                                                                                                                                       |
|-----------------------------------------------|---------|------------------------------------------------------|----|-----------------------------------------------------------------------------------------------------------------------------------------------------------------------------------------------------------------------|
| Martínez-Rumayor et al., 2009 (19695769) [17] | 247/0   | 91/156                                               | NA | <b>Smoking:</b> <ul style="list-style-type: none"> <li>- Smokers: mean AAO 55 years</li> <li>- Non-smokers: mean AAO 59 years (p=0.08)</li> <li>→ Later AAO</li> </ul>                                                |
| Mayeux et al., 1994 (8196685) [18]            | 150/180 | 69/81                                                | NA | <b>Smoking:</b> <ul style="list-style-type: none"> <li>- Smokers: AAO 64.2 years</li> <li>- Non-smokers: AAO 64.5 years (p=0.88)</li> <li>→ Similar AAO</li> </ul>                                                    |
| Neshige et al., 2021 (34130061) [19]          | 110/110 | 67/43                                                | NA | <b>Smoking:</b> <ul style="list-style-type: none"> <li>- Ever-smokers: AAO 63 years</li> <li>- Non-smokers: AAO 65 years (p=0.28)</li> <li>→ Similar AAO</li> </ul>                                                   |
| Papapetropoulos et al., 2005 (15747366) [20]  | 113/0   | 58/55<br>(14 smokers and 44 ex-smokers)              | NA | <b>Smoking:</b> <ul style="list-style-type: none"> <li>- Smokers: AAO 58.6 years</li> <li>- Ex-smokers: AAO 64.9 years</li> <li>- Non-smokers: AAO 65.5 years (p=0.006 and p=0.011)</li> <li>→ Earlier AAO</li> </ul> |
| Scott et al., 2005 (15699372) [21]            | 143/168 | NA                                                   | NA | <b>Smoking:</b> <ul style="list-style-type: none"> <li>- Ever-smokers: mean AAO 55.7 years</li> <li>- Non-smokers: mean AAO 55.4 years</li> <li>- 140 sibships</li> <li>→ Similar AAO</li> </ul>                      |
| Weisskopf et al., 2007 (17266085) [22]        | 137/466 | 128/153<br>(16 current smokers and 112 past smokers) | NA | <b>Smoking:</b> <ul style="list-style-type: none"> <li>- Current smokers: AAO 65.3 years</li> <li>- Past smokers: AAO 67.1 years</li> <li>- Never-smokers: AAO 66.7 years</li> <li>→ Similar AAO</li> </ul>           |

|                                         |         |        |                                           |                                                                                                                                                                                                                                                                                                                                                                                                                                                               |
|-----------------------------------------|---------|--------|-------------------------------------------|---------------------------------------------------------------------------------------------------------------------------------------------------------------------------------------------------------------------------------------------------------------------------------------------------------------------------------------------------------------------------------------------------------------------------------------------------------------|
| Cho et al., 2018<br>(29449185) [23]     | 196/0   | NA     | 136/60                                    | <b>Coffee:</b> <ul style="list-style-type: none"> <li>- Coffee drinkers: mean AAO 63.4 years</li> <li>- Non-coffee drinkers: mean AAO 67.3 years (p=0.008)</li> <li>→ Earlier AAO</li> </ul>                                                                                                                                                                                                                                                                  |
| Cho et al. 2019<br>(31412802) [24]      | 284/0   | NA     | 204/80<br>Males: 120/27<br>Females: 84/53 | <b>Coffee:</b> <ul style="list-style-type: none"> <li>- Coffee drinkers: AAO 62.8 years</li> <li>- Non-coffee drinkers: AAO 67.0 years (p=0.001)</li> <li>→ Earlier AAO</li> <li>- Male coffee drinkers: AAO 62.6 years</li> <li>- Male non-coffee drinkers: AAO 69.8 years (p=0.001)</li> <li>→ Earlier AAO</li> <li>- Female coffee drinkers: AAO 63.2 years</li> <li>- Female non-coffee drinkers: AAO 65.5 years (p=NS)</li> <li>→ Similar AAO</li> </ul> |
| Gigante et al., 2018<br>(29362953) [25] | 83/0    | 12/71  | 71/12                                     | <b>Coffee:</b> <ul style="list-style-type: none"> <li>- Number of coffee drinking years associated with a significant increase in AAO (p&lt;0.001)</li> <li>→ Later AAO (dosage effect)</li> </ul>                                                                                                                                                                                                                                                            |
| Tan et al. 2007<br>(18075470) [26]      | 418/468 | 81/337 | 401/17                                    | <b>Coffee:</b> <ul style="list-style-type: none"> <li>- Significant association between caffeine intake and the onset of PD (p=2.01x10<sup>-5</sup>)</li> <li>- Dosage effect, showing a later AAO the higher the caffeine consumption</li> <li>→ Later AAO (with dosage effect)</li> </ul>                                                                                                                                                                   |



## References

1. Smolensky L, Amondikar N, Crawford K, Neu S, Kopil CM, Daeschler M, Riley L, and Me Research T, Brown E, Toga AW, Tanner C (2020) Fox Insight collects online, longitudinal patient-reported outcomes and genetic data on Parkinson's disease. *Sci Data* 7:67 <https://doi.org/10.1038/s41597-020-0401-2>
2. Benedetti MD, Bower JH, Maraganore DM, McDonnell SK, Peterson BJ, Ahlskog JE, Schaid DJ, Rocca WA (2000) Smoking, alcohol, and coffee consumption preceding Parkinson's disease: a case-control study. *Neurology* 55:1350-1358
3. Kandinov B, Giladi N, Korczyn AD (2009) Smoking and tea consumption delay onset of Parkinson's disease. *Parkinsonism Relat Disord* 15:41-46
4. Luth T, Konig IR, Grunewald A, Kasten M, Klein C, Hentati F, Farrer M, Trinh J (2020) Age at Onset of LRRK2 p.Gly2019Ser Is Related to Environmental and Lifestyle Factors. *Mov Disord* 35:1854-1858
5. Maher NE, Golbe LI, Lazzarini AM, Mark MH, Currie LJ, Wooten GF, Saint-Hilaire M, Wilk JB, Volcjak J, Maher JE, Feldman RG, Guttman M, Lew M, Waters CH, Schuman S, Suchowersky O, Lafontaine AL, Labelle N, Vieregge P, Pramstaller PP, Klein C, Hubble J, Reider C, Growdon J, Watts R, Montgomery E, Baker K, Singer C, Stacy M, Myers RH (2002) Epidemiologic study of 203 sibling pairs with Parkinson's disease: the GenePD study. *Neurology* 58:79-84
6. Wijeyekoon R, Suriyakumara V, Gamage R, Fernando T, Jayasuriya A, Amarasinghe D, Gunasekara H, Sirisena D, Amaratunga D, Muthukuda C, Barker RA, Williams-Gray C, De Silva R (2017) Associations between Lifestyle Factors and Parkinson's Disease in an Urban Sri Lankan Clinic Study. *Int Arch Med* 10
7. Wilk JB, Lash TL (2007) Risk factor studies of age-at-onset in a sample ascertained for Parkinson disease affected sibling pairs: a cautionary tale. *Emerg Themes Epidemiol* 4:1
8. Yahalom G, Rigbi A, Israeli-Korn S, Krohn L, Rudakou U, Ruskey JA, Benshimol L, Tsafnat T, Gan-Or Z, Hassin-Baer S, Greenbaum L (2020) Age at Onset of Parkinson's Disease Among Ashkenazi Jewish Patients: Contribution of Environmental Factors, LRRK2 p.G2019S and GBA p.N370S Mutations. *J Parkinsons Dis* 10:1123-1132
9. De Reuck J, De Weweire M, Van Maele G, Santens P (2005) Comparison of age of onset and development of motor complications between smokers and non-smokers in Parkinson's disease. *J Neurol Sci* 231:35-39
10. Gallo V, Vineis P, Cancellieri M, Chiodini P, Barker RA, Brayne C, Pearce N, Vermeulen R, Panico S, Bueno-de-Mesquita B, Vanacore N, Forsgren L, Ramat S, Ardanaz E, Arriola L, Peterson J, Hansson O, Gavrila D, Sacerdote C, Sieri S, Kuhn T, Katzke VA, van der Schouw YT, Kyrozi A, Masala G, Mattiello A, Pernecky R, Middleton L, Saracci R, Riboli E (2019) Exploring causality of the association between smoking and Parkinson's disease. *Int J Epidemiol* 48:912-925
11. Gigante AF, Martino T, Iliceto G, Defazio G (2017) Smoking and age-at-onset of both motor and non-motor symptoms in Parkinson's disease. *Parkinsonism Relat Disord* 45:94-96
12. Grandinetti A, Morens DM, Reed D, MacEachern D (1994) Prospective study of cigarette smoking and the risk of developing idiopathic Parkinson's disease. *Am J Epidemiol* 139:1129-1138
13. Greenbaum L, Rigbi A, Lipshtat N, Cilia R, Tesei S, Asselta R, Djaldetti R, Goldwurm S, Lerer B (2013) Association of nicotine dependence susceptibility gene, CHRNA5, with Parkinson's disease age at onset: gene and smoking status interaction. *Parkinsonism Relat Disord* 19:72-76

14. Haack DG, Baumann RJ, McKean HE, Jameson HD, Turbek JA (1981) Nicotine exposure and Parkinson disease. *Am J Epidemiol* 114:191-200
15. Jimenez-Jimenez FJ, Mateo D, Gimenez-Roldan S (1992) Premorbid smoking, alcohol consumption, and coffee drinking habits in Parkinson's disease: a case-control study. *Mov Disord* 7:339-344
16. Kuopio AM, Marttila RJ, Helenius H, Rinne UK (1999) Environmental risk factors in Parkinson's disease. *Mov Disord* 14:928-939
17. Martinez-Rumayor A, Arrieta O, Sotelo J, Garcia E (2009) Female gender but not cigarette smoking delays the onset of Parkinson's disease. *Clin Neurol Neurosurg* 111:738-741
18. Mayeux R, Tang MX, Marder K, Cote LJ, Stern Y (1994) Smoking and Parkinson's disease. *Mov Disord* 9:207-212
19. Neshige S, Ohshita T, Neshige R, Maruyama H (2021) Influence of current and previous smoking on current phenotype in Parkinson's disease. *J Neurol Sci* 427:117534
20. Papapetropoulos S, Singer C, Villar JM, Gonzalez J, Mash DC (2005) Does cigarette smoking provide clinically significant neuroprotection among patients diagnosed with Parkinson's disease? *Mov Disord* 20:641-642
21. Scott WK, Zhang F, Stajich JM, Scott BL, Stacy MA, Vance JM (2005) Family-based case-control study of cigarette smoking and Parkinson disease. *Neurology* 64:442-447
22. Weisskopf MG, Grodstein F, Ascherio A (2007) Smoking and cognitive function in Parkinson's disease. *Mov Disord* 22:660-665
23. Cho BH, Choi SM, Kim JT, Kim BC (2018) Association of coffee consumption and non-motor symptoms in drug-naive, early-stage Parkinson's disease. *Parkinsonism Relat Disord* 50:42-47
24. Cho BH, Choi SM, Kim BC (2019) Gender-dependent effect of coffee consumption on tremor severity in de novo Parkinson's disease. *BMC Neurol* 19:194
25. Gigante AF, Asabella AN, Iliceto G, Martino T, Ferrari C, Defazio G, Rubini G (2018) Chronic coffee consumption and striatal DAT-SPECT findings in Parkinson's disease. *Neurol Sci* 39:551-555
26. Tan EK, Chua E, Fook-Chong SM, Teo YY, Yuen Y, Tan L, Zhao Y (2007) Association between caffeine intake and risk of Parkinson's disease among fast and slow metabolizers. *Pharmacogenet Genomics* 17:1001-1005
